# Supplementary material for: The association of intensive care with utilization and costs of outpatient healthcare services and quality of life
Source: PubMed Central journal article supplement (PMC6754134; doi:10.1371/journal.pone.0222671), 2019-09-20
Supplement: pone.0222671.s001.pdf [file pone.0222671.s001.pdf]

S1 Appendix: Supplementary Material

Table A: Entropy balancing diagnostics

| Variable                    | ICU treatment in previous 12 months |          |          |                    |          |          | Standardized Differences |
|-----------------------------|-------------------------------------|----------|----------|--------------------|----------|----------|--------------------------|
|                             | No (97.9%) (N=6,547)                |          |          | Yes (2.1%) (N=139) |          |          |                          |
|                             | Mean                                | Variance | Skewness | Mean               | Variance | Skewness | Pre                      |
| Age                         | 54.42                               | 239.3    | -0.100   | 61.39              | 176.2    | -0.461   | 0.52498084               |
| Gender                      | 0.480                               | 0.250    | 0.080    | 0.698              | 0.212    | -0.861   | 0.47263432               |
| Age-gender interaction term | 26.43                               | 875.2    | 0.447    | 43.70              | 928.0    | -0.560   | 0.56707728               |
| Body mass index             | 28.25                               | 26.41    | 0.817    | 30.76              | 41.26    | 0.312    | 0.39050868               |
| Waist-to-height ratio       | 0.544                               | 0.007    | 0.469    | 0.593              | 0.010    | 0.124    | 0.49411267               |
| Education (school years)    | 12.07                               | 6.592    | -0.075   | 11.75              | 7.607    | -0.317   | -0.11541875              |
| Equivalent household income | 1336                                | 454704   | 1.269    | 1197               | 320446   | 1.666    | -0.24579014              |
| Alcohol (g/d)               | 8.607                               | 182.5    | 3.505    | 6.395              | 109.9    | 2.313    | -0.21106285              |
| Relationship status         | 0.759                               | 0.183    | -1.214   | 0.810              | 0.155    | -1.580   | 0.12855333               |
| Insurance type              | 1.045                               | 0.069    | 1.983    | 1.017              | 0.016    | 7.564    | -0.22221085              |
| Smoking status              | 0.747                               | 0.699    | 0.502    | 0.625              | 0.581    | 0.745    | -0.15993731              |
| Physical inactivity         | 0.320                               | 0.218    | 0.771    | 0.373              | 0.236    | 0.525    | 0.10877801               |
| Diabetes                    | 0.122                               | 0.107    | 2.313    | 0.343              | 0.227    | 0.662    | 0.46419796               |
| Hypertension                | 0.654                               | 0.226    | -0.648   | 0.843              | 0.133    | -1.885   | 0.51690632               |
| Myocardial infarction       | 0.026                               | 0.025    | 5.976    | 0.084              | 0.078    | 2.997    | 0.20915668               |
| Stroke                      | 0.018                               | 0.018    | 7.223    | 0.141              | 0.122    | 2.067    | 0.35119328               |
| Lung disease                | 0.098                               | 0.089    | 2.697    | 0.097              | 0.088    | 2.718    | -0.00369515              |
| Kidney disease              | 0.034                               | 0.033    | 5.133    | 0.166              | 0.139    | 1.799    | 0.35245848               |
| Liver disease               | 0.082                               | 0.075    | 3.058    | 0.235              | 0.181    | 1.252    | 0.36016911               |
| Cancer                      | 0.069                               | 0.065    | 3.390    | 0.164              | 0.138    | 1.814    | 0.25493437               |
|                             | Reweighted                          |          |          |                    |          |          | Post                     |
| Age                         | 61.39                               | 176.2    | -0.461   | 61.39              | 176.2    | -0.461   | 0.00000138               |
| Gender                      | 0.698                               | 0.211    | -0.861   | 0.698              | 0.212    | -0.861   | -0.00000294              |
| Age-gender interaction term | 43.70                               | 928.0    | -0.560   | 43.70              | 928.0    | -0.560   | -0.00000206              |
| Body mass index             | 30.76                               | 41.26    | 0.312    | 30.76              | 41.26    | 0.312    | -0.00000002              |
| Waist-to-height ratio       | 0.593                               | 0.010    | 0.124    | 0.593              | 0.010    | 0.124    | -0.00000027              |
| Education (school years)    | 11.75                               | 7.607    | -0.317   | 11.75              | 7.607    | -0.317   | -0.00000096              |
| Equivalent household income | 1197                                | 320447   | 1.666    | 1197               | 320446   | 1.666    | -0.00000083              |
| Alcohol (g/d)               | 6.40                                | 109.9    | 2.313    | 6.395              | 109.9    | 2.313    | -0.00002295              |
| Relationship status         | 0.810                               | 0.154    | -1.580   | 0.810              | 0.155    | -1.580   | -0.00000069              |
| Insurance type              | 1.017                               | 0.033    | 2.457    | 1.017              | 0.016    | 7.564    | -0.00000122              |
| Smoking status              | 0.625                               | 0.577    | 0.745    | 0.625              | 0.581    | 0.745    | -0.00000205              |
| Physical inactivity         | 0.373                               | 0.234    | 0.525    | 0.373              | 0.236    | 0.525    | -0.00000123              |
| Diabetes                    | 0.343                               | 0.225    | 0.662    | 0.343              | 0.227    | 0.662    | 0.00000085               |
| Hypertension                | 0.843                               | 0.132    | -1.885   | 0.843              | 0.133    | -1.885   | -0.00000113              |
| Myocardial infarction       | 0.084                               | 0.077    | 2.997    | 0.084              | 0.078    | 2.997    | 0.00000115               |
| Stroke                      | 0.141                               | 0.121    | 2.067    | 0.141              | 0.122    | 2.067    | 0.00000190               |
| Lung disease                | 0.097                               | 0.088    | 2.718    | 0.097              | 0.088    | 2.718    | -0.00000030              |
| Kidney disease              | 0.166                               | 0.138    | 1.799    | 0.166              | 0.139    | 1.799    | 0.00000013               |
| Liver disease               | 0.235                               | 0.180    | 1.252    | 0.235              | 0.181    | 1.252    | -0.00000127              |
| Cancer                      | 0.164                               | 0.137    | 1.814    | 0.164              | 0.138    | 1.814    | 0.00000040               |

*Comparison of covariates before and after reweighting by entropy balancing (ebalance for Stata, Hainmueller & Xu 2013), with applied stabilized base weights from inverse probability weighting for drop-out adjustment*

S1 Appendix: Supplementary Material

Table B: Outpatient consultations and associated costs in the previous 12 months by ICU treatment status, including sensitivity analyses

| Variable                                            | Self-reported ICU treatment in previous 12 months |                       |                       |                                                                             |                                                                             |                      | Sensitivity analysis |       |       |  |
|-----------------------------------------------------|---------------------------------------------------|-----------------------|-----------------------|-----------------------------------------------------------------------------|-----------------------------------------------------------------------------|----------------------|----------------------|-------|-------|--|
|                                                     | Descriptive statistics                            |                       | PR                    | Regression models                                                           |                                                                             | E-value <sup>#</sup> |                      |       |       |  |
|                                                     | No (97.9%)<br>(N=6,547)                           | Yes (2.1%)<br>(N=139) |                       | Effect on probability of visit: Prevalence ratio (PR) [95% CI] <sup>§</sup> | Effect on number of visits and costs: % change (Δ) [95% CI] <sup>  ,¶</sup> | E(PR)                | E(CI)                | E(PR) | E(CI) |  |
| Proportion / N or Geometric mean / Geom. SD         | Adjusted <sup>†</sup>                             | Unadjusted            | Adjusted <sup>†</sup> | Unadjusted                                                                  |                                                                             |                      |                      |       |       |  |
| Any consultation (12 months)                        | 89.2% / 5842                                      | 98.6% / 137           | PR                    | 1.05 [1.03; 1.07]                                                           | 1.10 [1.08; 1.13]                                                           | 1.27                 | 1.19                 | 1.44  | 1.38  |  |
| Total number of consultations <sup>*</sup>          | 6.46 / 2.36                                       | 11.19 / 1.98          | Δ                     | +58.0% [+22.8%; +103.2%]                                                    | +71.6% [+32.9%; +121.6%]                                                    | 2.54                 | 1.76                 | 2.82  | 1.99  |  |
| Total consultation costs, € <sup>*</sup>            | 176.30 / 2.71                                     | 373.11 / 2.19         | Δ                     | +64.1% [+32.0%; +103.9%]                                                    | +96.2% [+36.4%; +182.2%]                                                    | 2.67                 | 1.97                 | 3.34  | 2.07  |  |
| Any consultation (4 weeks)                          | 43.8% / 2866                                      | 76.3% / 106           | PR                    | 1.32 [1.21; 1.45]                                                           | 1.74 [1.58; 1.92]                                                           | 1.97                 | 1.70                 | 2.88  | 2.54  |  |
| Number of consultations                             | 1.47 / 1.69                                       | 1.80 / 1.83           | Δ                     | +73.6% [+33.3%; +126.2%]                                                    | +120.9% [+78.4%; +173.7%]                                                   | 2.87                 | 2.00                 | 3.84  | 2.97  |  |
| Currently taking medication <sup>†</sup>            | 68.4% / 4478                                      | 86.3% / 120           | PR                    | 1.08 [1.02; 1.14]                                                           | 1.26 [1.18; 1.35]                                                           | 1.36                 | 1.15                 | 1.84  | 1.64  |  |
| Number of medications <sup>†</sup>                  | 2.68 / 2.10                                       | 4.67 / 2.04           | Δ                     | +37.8% [+17.7%; +61.5%]                                                     | +107.3% [+72.1%; +149.7%]                                                   | 2.10                 | 1.63                 | 3.57  | 2.84  |  |
| General practitioner                                | 76.1% / 4980                                      | 79.1% / 110           | PR                    | 0.90 [0.74; 1.09]                                                           | 1.04 [0.95; 1.13]                                                           | 1.48                 | 1.00                 | 1.25  | 1.00  |  |
| Number of consultations <sup>*</sup>                | 2.93 / 2.19                                       | 4.73 / 1.95           | Δ                     | -7.4% [-49.6%; +69.9%]                                                      | +49.1% [+10.4%; +101.3%]                                                    | 1.38                 | 1.00                 | 2.35  | 1.44  |  |
| Consultation costs, € <sup>*</sup>                  | 55.17 / 2.19                                      | 89.12 / 1.95          | Δ                     | -8.3% [-52.7%; +77.5%]                                                      | +48.9% [+6.6%; +107.8%]                                                     | 1.41                 | 1.00                 | 2.34  | 1.33  |  |
| Any specialist consultation                         | 77.3% / 5062                                      | 96.4% / 134           | PR                    | 1.13 [1.09; 1.16]                                                           | 1.25 [1.20; 1.29]                                                           | 1.50                 | 1.40                 | 1.80  | 1.70  |  |
| Number of consultations <sup>*</sup>                | 4.25 / 2.47                                       | 6.26 / 2.57           | Δ                     | +65.4% [+23.6%; +121.3%]                                                    | +85.1% [+35.1%; +153.6%]                                                    | 2.69                 | 1.78                 | 3.11  | 2.04  |  |
| Consultation costs, € <sup>*</sup>                  | 143.35 / 2.80                                     | 257.04 / 2.90         | Δ                     | +73.3% [+17.8%; +155.1%]                                                    | +121.9% [+32.9%; +270.4%]                                                   | 2.86                 | 1.63                 | 3.86  | 1.99  |  |
| <i>Specialist consultations by type<sup>*</sup></i> |                                                   |                       |                       |                                                                             |                                                                             |                      |                      |       |       |  |
| Internal medicine                                   | 28.2% / 1846                                      | 64.8% / 90            | PR                    | 1.67 [1.45; 1.92]                                                           | 2.30 [2.02; 2.61]                                                           | 2.73                 | 2.26                 | 4.02  | 3.45  |  |
| Number of consultations                             | 2.30 / 2.14                                       | 3.37 / 2.34           | Δ                     | +85.0% [+30.8%; +161.6%]                                                    | +220.8% [+75.8%; +485.5%]                                                   | 3.10                 | 1.94                 | 5.87  | 2.91  |  |
| Consultation costs, €                               | 140.73 / 2.14                                     | 206.12 / 2.33         | Δ                     | +88.3% [+31.8%; +168.9%]                                                    | +219.7% [+67.3%; +510.8%]                                                   | 3.17                 | 1.97                 | 5.85  | 2.73  |  |
| Surgery                                             | 16.8% / 1097                                      | 43.2% / 60            | PR                    | 2.42 [1.92; 3.05]                                                           | 2.58 [2.11; 3.14]                                                           | 4.27                 | 3.25                 | 4.59  | 3.65  |  |
| Number of consultations                             | 1.91 / 1.99                                       | 2.09 / 2.24           | Δ                     | +134.5% [+45.9%; +276.8%]                                                   | +171.7% [+23.5%; +498.0%]                                                   | 4.12                 | 2.28                 | 4.88  | 1.77  |  |
| Consultation costs, €                               | 77.51 / 2.00                                      | 85.63 / 2.25          | Δ                     | +133.2% [+40.5%; +286.8%]                                                   | +173.9% [+13.5%; +561.2%]                                                   | 4.09                 | 2.16                 | 4.92  | 1.53  |  |
| Neurology                                           | 9.7% / 634                                        | 22.3% / 31            | PR                    | 1.20 [0.79; 1.82]                                                           | 2.30 [1.67; 3.17]                                                           | 1.69                 | 1.00                 | 4.04  | 2.74  |  |
| Number of consultations                             | 2.12 / 2.12                                       | 1.74 / 1.84           | Δ                     | -53.1% [-81.5%; +18.7%]                                                     | +49.4% [-54.3%; +388.6%]                                                    | 3.69                 | 1.00                 | 2.35  | 1.00  |  |
| Consultation costs, €                               | 88.76 / 2.12                                      | 72.52 / 1.84          | Δ                     | -58.9% [-89.1%; +55.5%]                                                     | +49.2% [-57.3%; +420.9%]                                                    | 4.30                 | 1.00                 | 2.35  | 1.00  |  |
| Psychiatry or Psychotherapy                         | 5.0% / 324                                        | 13.7% / 19            | PR                    | 2.25 [1.30; 3.90]                                                           | 2.76 [1.79; 4.25]                                                           | 3.93                 | 1.93                 | 4.97  | 2.99  |  |
| Number of consultations                             | 4.79 / 2.89                                       | 4.20 / 2.40           | Δ                     | +95.5% [-30.3%; +448.6%]                                                    | +90.4% [-80.4%; +1752%]                                                     | 3.32                 | 1.00                 | 3.22  | 1.00  |  |
| Consultation costs, €                               | 351.27 / 2.89                                     | 308.12 / 2.40         | Δ                     | +107.2% [-28.6%; +501.2%]                                                   | +91.0% [-74.8%; +1346%]                                                     | 3.56                 | 1.00                 | 3.23  | 1.00  |  |
| Dermatology                                         | 18.5% / 1208                                      | 22.3% / 31            | PR                    | 0.98 [0.66; 1.45]                                                           | 1.21 [0.88; 1.66]                                                           | 1.19                 | 1.00                 | 1.71  | 1.00  |  |
| Number of consultations                             | 1.63 / 1.81                                       | 1.58 / 1.72           | Δ                     | -24.7% [-66.9%; +71.4%]                                                     | +7.0% [-48.7%; +123.2%]                                                     | 1.99                 | 1.00                 | 1.34  | 1.00  |  |
| Consultation costs, €                               | 28.80 / 1.81                                      | 28.03 / 1.71          | Δ                     | -23.8% [-68.4%; +83.6%]                                                     | +7.2% [-48.4%; +122.6%]                                                     | 1.95                 | 1.00                 | 1.35  | 1.00  |  |
| Ophthalmology                                       | 30.2% / 1974                                      | 40.3% / 56            | PR                    | 1.09 [0.89; 1.33]                                                           | 1.34 [1.09; 1.64]                                                           | 1.41                 | 1.00                 | 2.01  | 1.40  |  |
| Number of consultations                             | 1.52 / 1.81                                       | 1.58 / 2.20           | Δ                     | +58.3% [-12.0%; +184.8%]                                                    | +38.9% [-13.7%; +123.7%]                                                    | 2.54                 | 1.00                 | 2.12  | 1.00  |  |
| Consultation costs, €                               | 49.44 / 1.81                                      | 51.43 / 2.20          | Δ                     | +6.6% [-42.2%; +96.6%]                                                      | +39.0% [-19.8%; +141.0%]                                                    | 1.33                 | 1.00                 | 2.13  | 1.00  |  |
| Otorhinolaryngology                                 | 16.5% / 1081                                      | 19.4% / 27            | PR                    | 1.37 [0.93; 2.02]                                                           | 1.18 [0.83; 1.66]                                                           | 2.09                 | 1.00                 | 1.63  | 1.00  |  |
| Number of consultations                             | 1.54 / 1.80                                       | 1.67 / 1.99           | Δ                     | -3.8% [-44.0%; +65.3%]                                                      | +6.8% [-50.8%; +131.6%]                                                     | 1.24                 | 1.00                 | 1.34  | 1.00  |  |
| Consultation costs, €                               | 38.10 / 1.80                                      | 40.83 / 1.99          | Δ                     | -37.9% [-71.2%; +33.9%]                                                     | +5.6% [-53.4%; +139.5%]                                                     | 2.60                 | 1.00                 | 1.30  | 1.00  |  |
| Orthopedics                                         | 18.5% / 1214                                      | 28.8% / 40            | PR                    | 1.54 [1.11; 2.14]                                                           | 1.55 [1.19; 2.03]                                                           | 2.45                 | 1.45                 | 2.48  | 1.66  |  |
| Number of consultations                             | 1.93 / 1.92                                       | 2.15 / 2.22           | Δ                     | +81.6% [-7.9%; +258.3%]                                                     | +54.9% [-26.3%; +225.3%]                                                    | 3.03                 | 1.00                 | 2.47  | 1.00  |  |
| Consultation costs, €                               | 46.03 / 1.92                                      | 51.01 / 2.21          | Δ                     | +71.9% [-16.1%; +252.4%]                                                    | +54.0% [-28.9%; +233.5%]                                                    | 2.83                 | 1.00                 | 2.45  | 1.00  |  |
| Urology                                             | 19.7% / 1289                                      | 33.1% / 46            | PR                    | 1.03 [0.79; 1.34]                                                           | 1.68 [1.32; 2.14]                                                           | 1.19                 | 1.00                 | 2.75  | 1.97  |  |
| Number of consultations                             | 1.59 / 1.78                                       | 2.27 / 2.47           | Δ                     | +28.1% [-36.4%; +158.0%]                                                    | +121.8% [+23.0%; +299.9%]                                                   | 1.88                 | 1.00                 | 3.86  | 1.76  |  |
| Consultation costs, €                               | 36.80 / 1.78                                      | 52.43 / 2.47          | Δ                     | -53.4% [-81.6%; +18.0%]                                                     | +121.2% [+15.5%; +323.8%]                                                   | 3.72                 | 1.00                 | 3.85  | 1.58  |  |
| Gynecology (females only)                           | 61.6% / 2115                                      | 55.6% / 25            | PR                    | 0.88 [0.66; 1.17]                                                           | 0.90 [0.69; 1.17]                                                           | 1.52                 | 1.00                 | 1.46  | 1.00  |  |
| Number of consultations                             | 1.28 / 1.59                                       | 1.76 / 1.86           | Δ                     | -2.4% [-49.1%; +87.4%]                                                      | +17.7% [-29.8%; +97.2%]                                                     | 1.18                 | 1.00                 | 1.63  | 1.00  |  |
| Consultation costs, €                               | 36.07 / 1.59                                      | 49.98 / 1.89          | Δ                     | -31.0% [-72.9%; +76.2%]                                                     | +19.7% [-35.6%; +122.4%]                                                    | 2.25                 | 1.00                 | 1.68  | 1.00  |  |

<sup>\*</sup>Number and costs of consultations: SHIP-2 only (N=2,324)

<sup>†</sup>Excluding contraceptives

<sup>‡</sup>Adjusted for age, gender, number of chronic diseases, cohort (SHIP-2/Trend-0), with balancing weights

<sup>§</sup>Any consultation or medication intake: Poisson regression with robust standard errors

<sup>||</sup>Number of consultations or medications: Negative binomial regression

<sup>¶</sup>Consultation costs: Generalized linear models with gamma-distribution and a log-link function

<sup>#</sup>VanderWeele & Ding, Ann Int Med 2017

S1 Appendix: Supplementary Material

Table C: EQ-5D-3L index values and subdomains by ICU treatment status, including sensitivity analyses

|                                              | ICU treatment in previous 12 months            |                       |    |                                                                                            |                       | Sensitivity analysis  |       |            |       |
|----------------------------------------------|------------------------------------------------|-----------------------|----|--------------------------------------------------------------------------------------------|-----------------------|-----------------------|-------|------------|-------|
|                                              | Descriptive statistics                         |                       |    | Regression models                                                                          |                       | E-value <sup>  </sup> |       |            |       |
|                                              | No (97.9%)<br>(N=6,547) <sup>*</sup>           | Yes (2.1%)<br>(N=139) |    | Percent change (Δ) [95% CI] <sup>†</sup> or<br>Prevalence ratio (PR) [95% CI] <sup>§</sup> |                       | E(PR)                 | E(CI) | E(PR)      | E(CI) |
| Variable                                     | Geometric mean / Geom. SD<br>or Proportion / N |                       |    | Adjusted <sup>†</sup>                                                                      | Unadjusted            | Adjusted <sup>†</sup> |       | Unadjusted |       |
| EQ5D-3L index value                          | <b>0.88</b> / 1.29                             | <b>0.77</b> / 1.57    | Δ  | <b>-13.7%</b> [-27.0%; -0.3%]                                                              | -8.5% [-12.9%; -4.1%] | n/a                   |       | n/a        |       |
| <i>Any impairment in EQ-5D-3L Subdomains</i> |                                                |                       |    |                                                                                            |                       |                       |       |            |       |
| Mobility                                     | <b>13.0%</b> / 850                             | <b>26.6%</b> / 37     | RR | 1.27 [0.93; 1.71]                                                                          | 2.04 [1.54; 2.71]     | 1.85                  | 1.00  | 3.51       | 2.45  |
| Self-Care                                    | <b>1.6%</b> / 105                              | <b>6.5%</b> / 9       | RR | <b>3.41</b> [1.71; 6.82]                                                                   | 4.03 [2.08; 7.79]     | 6.29                  | 2.81  | 7.52       | 3.58  |
| Usual Activity                               | <b>10.9%</b> / 714                             | <b>23.0%</b> / 32     | RR | <b>1.68</b> [1.21; 2.34]                                                                   | 2.11 [1.54; 2.88]     | 2.75                  | 1.71  | 3.63       | 2.45  |
| Pain/Discomfort                              | <b>55.3%</b> / 3608                            | <b>70.5%</b> / 98     | RR | 1.10 [0.99; 1.21]                                                                          | 1.28 [1.14; 1.42]     | 1.44                  | 1.00  | 1.87       | 1.55  |
| Anxiety/Depression                           | <b>18.7%</b> / 1218                            | <b>23.0%</b> / 32     | RR | 1.09 [0.74; 1.59]                                                                          | 1.23 [0.91; 1.68]     | 1.39                  | 1.00  | 1.77       | 1.00  |

<sup>\*</sup>N=18 observations (<1%) excluded (EQ-5D not available)

<sup>†</sup>Adjusted for age, gender, number of chronic diseases, cohort (SHIP-2/Trend-0), with balancing weights

<sup>‡</sup>EQ-5D index value: fractional response model with average marginal effects

<sup>§</sup>EQ-5D subdomain impairments: Poisson regression

<sup>||</sup>VanderWeele & Ding, Ann Int Med 2017
